# Supplementary material
Source: publisher figshare collection journal article supplement (https://aacr.figshare.com/articles/dataset/_/22425367)

# Supplementary Figure 6

**A**

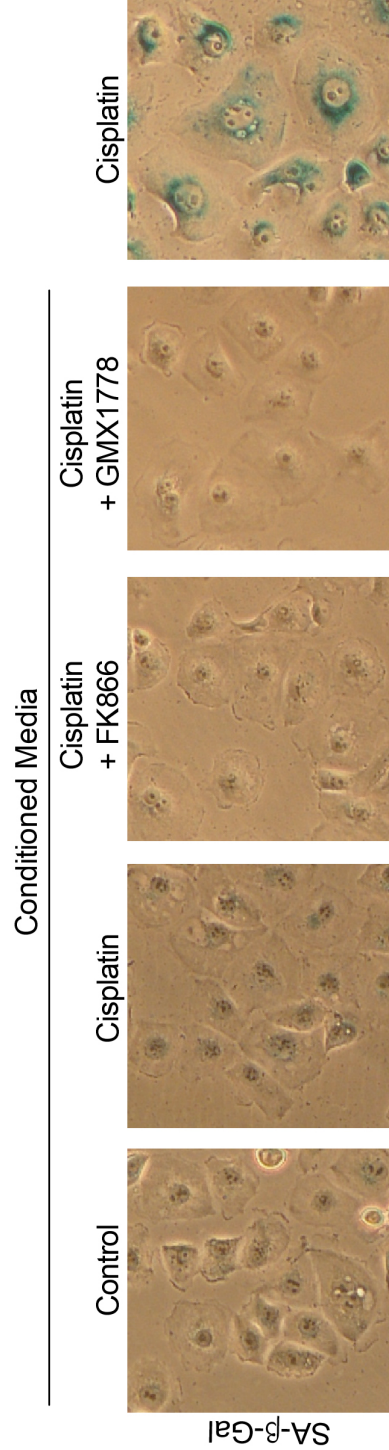

**B**

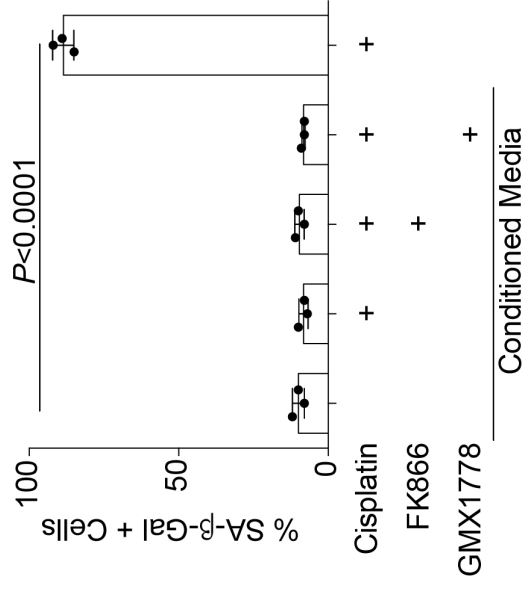

Supplement: Supplementary file 1 [file 39871582]
